1 **Hoxb5 reprograms murine multipotent blood progenitors into hematopoietic stem cell-**  
2 **like cells**

3 Dehao Huang<sup>1,3,#</sup>, Qianhao Zhao<sup>2,#</sup>, Qitong Weng<sup>1,3</sup>, Qi Zhang<sup>1,3</sup>, Kaitao Wang<sup>5</sup>, Lijuan Liu<sup>1</sup>,  
4 Chengxiang Xia<sup>1</sup>, Tongjie Wang<sup>6</sup>, Jiapin Xiong<sup>1,3</sup>, Xiaofei Liu<sup>1</sup>, Yuxian Guan<sup>1</sup>, Yang Geng<sup>1</sup>,  
5 Fang Dong<sup>7,8</sup>, Hui Cheng<sup>7,8</sup>, Jinyong Wang<sup>1,3,6,\*</sup>, Mengyun Zhang<sup>4,\*</sup>, Fangxiao Hu<sup>1,\*</sup>.

6 <sup>1</sup>CAS Key Laboratory of Regenerative Biology, Guangzhou Institutes of Biomedicine and  
7 Health, Chinese Academy of Sciences, Guangzhou, China.

8 <sup>2</sup>Faculty of Forensic Medicine, Zhongshan School of Medicine, Sun Yat-Sen University, China.

9 <sup>3</sup>University of Chinese Academy of Sciences, Beijing, China.

10 <sup>4</sup>GMU-GIBH Joint School of Life Sciences, Guangzhou Medical University, Guangzhou,  
11 China.

12 <sup>5</sup>School of Biomedical Engineering, Sun Yat-Sen University, Shenzhen, China.

13 <sup>6</sup>Guangzhou Regenerative Medicine and Health-Guangdong Laboratory (GRMH-GDL),  
14 Guangzhou, China.

15 <sup>7</sup>State Key Laboratory of Experimental Hematology & National Clinical Research Center for  
16 Blood Diseases, Institute of Hematology & Blood Diseases Hospital, Chinese Academy of  
17 Medical Sciences & Peking Union Medical College, Tianjin, China.

18 <sup>8</sup>Center for Stem Cell Medicine & Department of Stem Cell and Regenerative Medicine,  
19 Chinese Academy of Medical Sciences & Peking Union Medical College, Tianjin, China.

20 These two authors contributed equally to this work: Dehao Huang and Qianhao Zhao

21 \*Correspondence: Fangxiao Hu ([hu\\_fangxiao@gibh.ac.cn](mailto:hu_fangxiao@gibh.ac.cn)), Mengyun Zhang  
22 ([dreamyun11@163.com](mailto:dreamyun11@163.com)) or Jinyong Wang ([wang\\_jinyong@gibh.ac.cn](mailto:wang_jinyong@gibh.ac.cn))

23 **Abstract**

24 The expression of transcription factor Hoxb5 specifically marks the functional hematopoietic  
25 stem cells (HSC) in mice. However, our recent work demonstrated that ectopic expression of  
26 Hoxb5 exerted little effect on HSC but could convert B cell progenitors into functional T cells  
27 in vivo. Thus, cell type- and development stage-specific roles of Hoxb5 in hematopoietic  
28 hierarchy await more extensive exploration. Here, with a mouse strain engineered with  
29 conditional expression of Hoxb5, we unveiled that induced expression of Hoxb5 in mouse  
30 multipotent progenitor cells (MPP) led to the generation of a *de novo* Sca1<sup>+</sup>cKit<sup>+</sup>Mac1<sup>+</sup>CD48<sup>+</sup>  
31 (Mac1<sup>+</sup>CD48<sup>+</sup>SK) cell type, which has the ability to repopulate long-term multi-lineage  
32 hematopoiesis in serial transplant recipients. RNA-seq analyses showed that Mac1<sup>+</sup>CD48<sup>+</sup>SK  
33 cells exhibited an acquired machinery of DNA replication and cell division, which resembled

34 nature fetal liver HSC cells (FL HSC). In short, our current study uncovers that Hoxb5 is able  
35 to empower MPP with self-renewal potential, thereby providing new strategies to reprogram  
36 blood progenitor cells into HSC-like cells.

## 37 **Introduction**

38 Hematopoietic stem cell (HSC) is the blood cell type that possesses dual features of self-  
39 renewal and multi-lineage potential, which are critical for replenishing the entire hematopoietic  
40 system throughout an individual lifespan (Morrison and Weissman, 1994; Seita and Weissman,  
41 2010). However, the absolute numbers of HSC in adults are extremely rare (Abkowitz et al.,  
42 2002; Bernitz et al., 2016) and are not efficiently expanded in vitro (Kumar and Geiger, 2017;  
43 Tajer et al., 2019). Researchers have been attempting alternative approaches to generate  
44 engraftable blood progenitors by enforcing expressing those molecules highly expressed in  
45 HSC but absent in downstream progenies. Ectopic expression of Sox17 can confer self-renewal  
46 potential on adult hematopoietic progenitors. However, this approach eventually led to  
47 leukemogenesis (He et al., 2011). Likewise, miR-125a is a non-coding RNA gene  
48 preferentially expressed in HSC rather than blood progenies (Guo et al., 2010). Ectopic  
49 expression of miR-125a in mouse hematopoietic progenitors induced long-term hematopoiesis,  
50 but the recipient mice suffered an MPN-like disease after secondary transplantation (Gerrits et  
51 al., 2012; Wojtowicz et al., 2016; Wojtowicz et al., 2014). Therefore, more extensive and  
52 innovative efforts are needed to develop safer approaches to convert blood progenitor cells into  
53 engraftable blood stem cells for ultimately therapeutic uses.

54 Hoxb5, a member of *HOX* gene family, is preferentially expressed in HSC, and uniquely marks  
55 the long-term HSC (Chen et al., 2016; Gulati et al., 2019). Our recent study showed that gain  
56 of function of Hoxb5 in pro-pre-B cells reprogrammed these cells into T lymphocytes *in vivo*  
57 (Zhang et al., 2018). Moreover, the latest research shows that exogenous Hoxb5 expression  
58 confers protection against loss of self-renewal to Hoxb5-negative HSCs and can partially alter  
59 the cell fate of ST-HSCs to that of LT-HSCs (Sakamaki et al., 2021). Here, we further studied  
60 the potential role of Hoxb5 in MPP cell context, an intermediate progeny of HSC without self-  
61 renewal ability. Interestingly, conditional overexpression of Hoxb5 in MPP upon  
62 transplantation led to long-term hematopoiesis in serial transplanted mice. More importantly,  
63 Hoxb5 resulted in a *de novo* cell type defined as Mac1<sup>+</sup>CD48<sup>+</sup>SK, which contributed to the  
64 sustainable long-term hematopoiesis in serial transplant recipients. By single cell RNA-seq  
65 analysis, Mac1<sup>+</sup>CD48<sup>+</sup>SK cells demonstrated an activated machinery of DNA replication and  
66 cell division, resembling the characteristics of FL HSC, which associated with their acquired

67 self-renewal feature. This study reveals *de novo* evidence that Hoxb5 can efficiently reprogram  
68 blood progenitors into engraftable blood stem cells, thereby offering a new strategy to expand  
69 the engraftable cell source for bone marrow transplantation

## 70 **Results**

### 71 **Enforced expression of Hoxb5 in MPP leads to long-term hematopoiesis in** 72 **transplantation setting**

73 To evaluate the potential role of Hoxb5 in MPP, we chose *Hoxb5*<sup>LSL/+</sup> Mx1-cre mouse  
74 model(Zhang et al., 2018) to conditionally express Hoxb5 in MPP. Upon transplantation into  
75 recipient animals, ectopic Hoxb5 expression can be turned on by injection with polyinosinic-  
76 polycytidylic acid (pIpC) and the GFP signal reports the expression of the Hoxb5 at single cell  
77 resolution. We sorted the conventional MPP (CD45.2<sup>+</sup>GFP<sup>-</sup>Lin (CD2, CD3, CD4, CD8, Mac-  
78 1, Gr1, B220, Ter119)<sup>-</sup>CD48<sup>-</sup>Sca1<sup>+</sup>c-kit<sup>+</sup>CD150<sup>-</sup>CD135<sup>+</sup>)(Adolfsson et al., 2001; Kiel et al.,  
79 2005) from the Sca1<sup>+</sup> enriched bone marrow cells of *Hoxb5*<sup>LSL/+</sup> Mx1-cre mouse or *Hoxb5*<sup>LSL/+</sup>  
80 mouse. Four hundred sorted MPP along with 0.25 million Sca1<sup>-</sup> helper cells (CD45.1<sup>+</sup>) were  
81 retro-orbitally transplanted into irradiated individual recipients (CD45.1<sup>+</sup> C57BL/6  
82 background) (**Figure 1A-B**). The recipients were injected intraperitoneally with pIpC (250  
83 ug/mouse) every other day for six times starting at day5 before transplantation. We assessed  
84 the reconstitution ability of the donor derived cells by analyzing the peripheral blood (PB)  
85 chimeras every four weeks until 20<sup>th</sup> week post-transplantation. (**Figure 1A**). Amazingly, in  
86 the primary recipients transplanted with the MPP of the *Hoxb5*<sup>LSL/+</sup> Mx1-cre mouse, the ratio  
87 of the donor-derived cells (CD45.2<sup>+</sup>GFP<sup>+</sup>) continuously increased and the minimum ratio was  
88 up to 62% at the 20<sup>th</sup> week post-transplantation, whereas the control recipients transplanted  
89 with the *Hoxb5*<sup>LSL/+</sup> MPP shows a significantly low reconstitution ability, and the maximum  
90 donor-derived cells (CD45.2<sup>+</sup>) ratio was 11.4% at the 20<sup>th</sup> week post-transplantation (**Figure**  
91 **1C**). Furthermore, the contributions of donor-derived cells in spleen (SP) and bone marrow  
92 (BM) tissues of the Hoxb5-expressing MPP recipients were significantly more than the control  
93 group ( $p < 0.001$ ) (**Figure supplement 1A**). In addition, multiple blood lineages including T  
94 cells (CD3<sup>+</sup>), B cells (CD19<sup>+</sup>), and Myeloid (Mac-1<sup>+</sup> or Gr1<sup>+</sup>) in the PB, SP, and BM were also  
95 detected at 20<sup>th</sup> week post-transplantation in the primary recipients (**Figure 1D**). These results  
96 demonstrate that enforced expression of Hoxb5 in MPP leads to long-term hematopoiesis.

### 97 **Hoxb5 results in the occurrence of a *de novo* Mac-1<sup>+</sup>CD48<sup>+</sup> SK cell type associated with** 98 **the long-term engraftable feature**

99 To investigate the cellular mechanism, we analyzed the blood progenitor cells in the primary  
100 recipients at the 20<sup>th</sup> week post-transplantation. We discovered a *de novo* donor-derived  
101 Sca1<sup>+</sup>c-kit<sup>+</sup> population cells, which simultaneously expressed Mac-1 and CD48 surface markers.  
102 Certainly, this cell type is not identified in natural blood cells in the absence of Hoxb5  
103 expression (**Figure 2A**). Consistent with previous reports, natural MPP transplantation cannot  
104 sustainably give rise to LSK cells in the bone marrow of recipient mice (**Figure supplement**  
105 **1B**). To further test whether the Mac-1<sup>+</sup>CD48<sup>+</sup> SK cells are responsible for the long-term  
106 repopulating feature in Hoxb5 expressing MPP, we sorted the GFP<sup>+</sup>Mac-1<sup>+</sup>CD48<sup>+</sup> SK cells  
107 and transplanted them into secondary recipient mice (CD45.1<sup>+</sup> C57BL/6 background, 2000  
108 cells/mouse) with Sca1<sup>-</sup> helper cells (CD45.1<sup>+</sup> 0.25 million/mouse). As expected, these Mac-  
109 1<sup>+</sup>CD48<sup>+</sup> SK cells successfully reconstituted multi-lineage hematopoiesis in secondary  
110 recipients, as demonstrated by stable increases of donor-derived cells (GFP<sup>+</sup>) in the PB after  
111 transplantation (**Figure 2B**). Of note, the donor chimeras achieved as high as 94.6% at the 20<sup>th</sup>  
112 week after transplantation and lineages of T, B and myeloid cells can be detected at the 4<sup>th</sup>, 12<sup>th</sup>  
113 and 20<sup>th</sup> post-transplantation (**Figure 2B-C**). Moreover, the donor-derived T, B and myeloid  
114 lineages in the PB, SP and BM also exhibited patterns resembling natural hematopoiesis at the  
115 24<sup>th</sup> week post-transplantation (**Figure 2D**). More importantly, the donor-derived Mac-  
116 1<sup>+</sup>CD48<sup>+</sup> SK cells can still be detected in the BM of the secondary recipients (**Figure 2E**).  
117 These results indicate that the *de novo* Mac-1<sup>+</sup>CD48<sup>+</sup> SK cell type is engraftable in the  
118 secondary recipients.

119 To assess the long-term hematopoiesis capacity of the Mac-1<sup>+</sup>CD48<sup>+</sup> SK cells. we did the third  
120 transplantation using total BM cells of the Mac-1<sup>+</sup>CD48<sup>+</sup> SK recipients (Secondary recipients).  
121 Recipients (CD45.1<sup>+</sup> C57BL/6 background) accepted the lethally irradiation first (9 Gy), and  
122 then were retro-orbitally injected with the total BM cells (10 million/mouse, n = 6) from the  
123 secondary recipients. The contribution of CD45.2<sup>+</sup>GFP<sup>+</sup> donor cells to the peripheral blood  
124 was assessed at week- 8<sup>th</sup>, 16<sup>th</sup>, 20<sup>th</sup>, 26<sup>th</sup> and 32<sup>th</sup> after transplantation. All of the recipients  
125 were reconstituted with the CD45.2<sup>+</sup>GFP<sup>+</sup> cells with the ratio of 48.7%-74.2% 8 weeks post-  
126 transplantation, and the average ratio was still 49% after transplantation for 32 weeks (**Figure**  
127 **3A**). Moreover, the donor-derived cells ratio even has no significant difference ( $p = 0.075$ )  
128 even at the week 32<sup>th</sup> compared with the week 8<sup>th</sup> post-transplantation (**Figure 3B**). Meanwhile,  
129 the donor-derived cells also showed multi-lineage distributions in PB after 8 weeks and 20  
130 weeks later post-transplantation (**Figure 3C**). Furthermore, The average ratio of T cells (CD3<sup>+</sup>)  
131 was 7.1% (week 8<sup>th</sup>, n = 6), 17.4% (week 20<sup>th</sup>, n = 6) and 16.1% (week 32<sup>th</sup>, n = 6), B cells  
132 (CD19<sup>+</sup>) was 83.2% (week 8<sup>th</sup>, n = 6), 76.5% (week 20<sup>th</sup>, n = 6) and 82.8% (week 32<sup>th</sup>, n = 6),

133 and Myeloid cells (Mac1<sup>+</sup> or Gr1<sup>+</sup>) was 11.1% (week 8<sup>th</sup>, n = 6), 10.6% (week 20<sup>th</sup>, n = 6) and  
134 7.7% (week 32<sup>th</sup>, n = 6) post-transplantation in PB respectively (**Figure 3D**). Collectively, these  
135 results indicate that the Mac-1<sup>+</sup>CD48<sup>+</sup> SK cells can sustain the long-term hematopoiesis in  
136 serial transplantation.

137 **Mac-1<sup>+</sup>CD48<sup>+</sup> SK cells showed proliferating signatures of DNA replication and cycling,**  
138 **resembling fetal liver HSC cells**

139 To investigate the underlying molecular mechanism, we characterized the Mac-1<sup>+</sup>CD48<sup>+</sup> SK  
140 cells (n = 47) at transcriptome level by single cell RNA-seq analysis. Meanwhile, we also  
141 performed the single cell RNA-seq of the BM HSC (n = 36, Hoxb5<sup>LSL/+</sup> mice, 8 weeks old)  
142 and WT-MPP (n = 42, Hoxb5<sup>LSL/+</sup> mice, 8 weeks old). Certainly, we also sorted the single  
143 cells of FL HSC (n = 56, Hoxb5<sup>LSL/+</sup> mice, Day14.5 embryo), and performed the RNA-seq  
144 (**Figure supplement 1C**). To dissect the transcriptome signature between Mac-1<sup>+</sup>CD48<sup>+</sup> SK  
145 cells and the other three cell types (BM HSC, FL HSC, WT-MPP), we first found out the  
146 differentially expressed genes (adjusted *P* value <0.05) between FL HSC and WT-MPP. The  
147 up- and down-regulated differential expressed genes for FL HSC versus WT-MPP were  
148 respectively used as gene set for Gene set-enrichment analysis (GSEA) between Mac-1<sup>+</sup>CD48<sup>+</sup>  
149 SK cells and WT-MPP. (**Figure 4A-B, File supplement 1-2**). The results showed that the up-  
150 regulated genes were enriched in the Mac-1<sup>+</sup>CD48<sup>+</sup> SK cells (**Figure 4A**). Meanwhile, we also  
151 calculated out the up- and down-regulated differential expressed genes (adjusted *P* value <0.05)  
152 for FL HSC versus BM HSC. The GSEA between Mac-1<sup>+</sup>CD48<sup>+</sup> SK cells and WT-MPP  
153 suggested that these up-regulated genes were also enriched in the Mac-1<sup>+</sup>CD48<sup>+</sup> SK cells  
154 (**Figure 4C-D, File supplementary 3-4**). Moreover, We combined the leading edge genes from  
155 Fig.4a and Fig.4c, and performed the heatmap analysis. The result showed that the expression  
156 level of these genes in Mac-1<sup>+</sup>CD48<sup>+</sup> SK cells is equivalent to these in FL HSC cells (**Figure**  
157 **4E**). We further performed Gene-ontology (GO) analysis using these leading edge genes, and  
158 observed that they are abundantly involved in cell proliferation process, especially the  
159 processes of DNA replication, chromosome segregation (**Figure 4F**). Moreover, besides the  
160 higher expression of Hoxb5 both in Mac-1<sup>+</sup>CD48<sup>+</sup> SK cells and FL HSC compared with BM  
161 HSC and WT-MPP, several genes were also up-regulated, which not only regulating the cell  
162 cycle, but also have a vital role in the regulation of hematopoiesis, including *Birc5* (Gurbuxani  
163 et al., 2005), *Gmnn* (Yasunaga et al., 2016), *Cdt1* (Yasunaga et al., 2016), *Cdc45* (Flach et al.,  
164 2014), and *Gins1* (Ueno et al., 2009) (**Figure 4G**). Furthermore, we also find out the genes of  
165 *Cdk6* (Scheicher et al., 2015), *Satb1* (Will et al., 2013; Yasui et al., 2002), *Runx3* (de Bruijn  
166 and Dzierzak, 2017) and *Mybl2* (Baker et al., 2014; Bayley et al., 2018), which were only up-

167 regulated in Mac-1<sup>+</sup>CD48<sup>+</sup> SK cells, and have an important role in HSC homeostasis or  
168 development. Thus, these results indicate that Hoxb5 expression empowers self-renewal  
169 capacity on Mac-1<sup>+</sup>CD48<sup>+</sup> SK cells by activating cell cycle and DNA replication machinery,  
170 resembling the FL HSC cells.

171

## 172 **Discussion**

173 In this study, we explored the role of Hoxb5 in MPP cell context. Hoxb5 expression leads to  
174 long-term hematopoiesis of MPP in serial transplantation settings by generating the Mac-  
175 1<sup>+</sup>CD48<sup>+</sup> SK cells, a *de novo* cell type that naturally does not exist. At the transcriptome level,  
176 the Mac-1<sup>+</sup>CD48<sup>+</sup> SK cells showed molecular signatures of cell division and proliferation  
177 resembling the FL HSC, which correlating their acquired self-renewal feature.

178 Stemness feature is the only functional difference between HSC and their progeny MPP.  
179 However, the stemness-losing mechanism along the differentiation path from HSC to MPP is  
180 unknown. The genes shut down or down-regulated in MPP, such as *Hoxb5*, might be  
181 accountable for the loss of stemness from HSC to MPP. Moreover, this maybe indicated by the  
182 latest research, which reported that exogenous Hoxb5 expression confers protection against  
183 loss of self-renewal to Hoxb5-negative HSC and can partially alter the cell fate of ST-HSC to  
184 that of LT-HSC (Sakamaki et al., 2021). Here, despite over-expressing Hoxb5 in MPP  
185 generated no phenotypic HSC-like cells, the *de novo* Mac-1<sup>+</sup>CD48<sup>+</sup> SK cells can substitute  
186 natural HSC for long-term engraftment. Interestingly, FL HSC shared two features with  
187 Hoxb5-expressing Mac-1<sup>+</sup>CD48<sup>+</sup> SK cells, one is undergoing rapid proliferation, and the other  
188 is expressing Mac-1 marker (Kim et al., 2006; Morrison et al., 1995). However, natural adult  
189 HSC lose the expression of Mac-1 (Morrison and Weissman, 1994), which is consistent with  
190 their predominant dormancy under homeostasis. Therefore, the expression of Mac-1 is  
191 phenotypically associated with the fast expanding features of FL HSC and Hoxb5-expressing  
192 Mac-1<sup>+</sup>CD48<sup>+</sup> SK cells. Seemingly, the enforced expression of Hoxb5 in MPP activates a cell  
193 division machinery (Dalton, 2015; Gao and Liu, 2019) without compromising their multi-  
194 lineage differentiation potential just as FL HSC.

195 Reportedly, ectopic expression of either Sox17 or miR-125a in MPP can confer a self-renewal  
196 ability, but eventually resulted in hematologic malignancies (Chhabra and Mikkola, 2011; Hu  
197 and Shivdasani, 2005; Krivtsov et al., 2006). MiR-125a-induced MPN displayed a complex  
198 manner of oncogene-dependency (Guo et al., 2012). Interestingly, no hematologic  
199 malignancies were found in the recipients transplanted with the Hoxb5-expressing MPP. Even  
200 the expression of Hoxb5 in total BM of the *Hoxb5*<sup>LSL/+</sup> vav-cre mouse showed a normal

201 hematopoiesis (Zhang et al., 2018). Thus, the self-renewal feature activated by *Hoxb5* might  
202 be insulated from oncogenesis.

203 We also tested the engraftment potential of HOXB5-expressing human MPP in  
204 immunodeficient animals. Unfortunately, the HOXB5-expressing human MPP failed to  
205 recapitulate the long-term engraftment phenotype of *Hoxb5*-expressing murine MPP (data not  
206 shown). One possible reason is that the function of HOXB5 is not conservative between human  
207 and mouse species. However, we cannot exclude another possibility that HOXB5-  
208 overexpressing human MPP need a humanized bone marrow micro-environment for HOXB5-  
209 reprogramming, which is not available in current immunodeficient animal models.

210 In conclusion, our study reveals a rare role of *Hoxb5* in empowering self-renewal capacity on  
211 MPP, which provides insights into converting blood progenitors into alternative engraftable  
212 cell source.

213

## 214 **Materials and methods**

### 215 **Mice**

216 Animals were housed in the animal facility of the Guangzhou Institutes of Biomedicine and  
217 Health (GIBH). *Hoxb5*<sup>LSL/+</sup> mice were described as previous reported (Zhang et al., 2018).  
218 CD45.1, Mx1-cre and Vav-cre strains were purchased from the Jackson laboratory. All the  
219 mouse lines were maintained on a pure C57BL/6 genetic background. All experiments were  
220 conducted in accordance with experimental protocols approved by the Animal Ethics  
221 Committee of GIBH.

### 222 **Flow cytometry**

223 Antibodies to CD2 (RM2-5), CD3 (145-2C11), CD4 (RM4-5), CD8a (53-6.7), Gr1 (RB6-8C5),  
224 Mac-1 (M1/70), Ter119 (TER-119), B220 (6B2), c-kit (2B8), Sca-1 (E13-161.7), CD135  
225 (A2F10), CD150 (TC15-12F12.2), CD19 (eBio1D3), CD48 (HM48-1) ki-67 (16A8), Fcγ  
226 RII/III (2.4G2), CD127 (SB/199), CD45.2 (104) CD45.1(A20) were purchased from  
227 eBioscience or BioLegend. DAPI, 7-AAD and PI were used to stain dead cells. Flow cytometry  
228 was performed on an LSR Fortessa (BD Biosciences) and data were processed by FlowJo  
229 software (Version: 10.4.0, Tree Star).

### 230 **Cell sorting**

231 Cells used for sorting were first incubated with the biotin-conjugated antibody to Sca1 (anti-  
232 Sca1 biotin) and then enriched using Anti-Biotin MicroBeads by AutoMACS Pro (Miltenyi  
233 Biotec). The enriched cells, stained with the antibodies, were sorted by BD FACSAria III.

### 234 **Transplantation**

235 All recipients (CD45.1<sup>+</sup>, C57BL/6) were lethally irradiated (9 Gy, RS2000, Rad Source) at  
236 least 4 hours before transplantation. MPP (400 cells/mouse) from Hoxb5<sup>LSL/+</sup> mouse or  
237 Hoxb5<sup>LSL/+</sup> Mx1-cre mouse for primary transplantation, and donor-derived CD48<sup>+</sup>Mac-1<sup>+</sup> SK  
238 (2000 cells/mouse) from the primary recipients for secondary transplantation were retro-  
239 orbitally transplanted into the recipients with the Sca1<sup>-</sup> helper cells (CD45.1<sup>+</sup> 0.25  
240 million/mouse). For third transplantation, total BM cells (10 million/mouse) of the secondary  
241 recipients were used as the donor cells. To induce Hoxb5 expression, the primary recipients  
242 were intraperitoneally injected with polyinosinic-polycytidylic acid (pIpC) (250 ug/mouse)  
243 every other day for six times starting from the day5 before transplantation. Recipients were fed  
244 with the water added with trimethoprim-sulfamethoxazole for one month after irradiation.

#### 245 **RNA-seq and data analysis**

246 cDNA of the single cell from adult wide type HSC (BM HSC, Hoxb5<sup>LSL/+</sup> mice, 8weeks old),  
247 Fetal liver HSC (FL HSC, Hoxb5<sup>LSL/+</sup> mice, Day14.5, defined as CD45.2<sup>+</sup>Lin<sup>-</sup>Sca1<sup>+</sup>c-  
248 kit<sup>+</sup>Mac1<sup>+</sup>CD150<sup>+</sup>), Wide type MPP (WT-MPP, Hoxb5<sup>LSL/+</sup> mice, 8 weeks old) and donor-  
249 derived CD48<sup>+</sup>Mac-1<sup>+</sup> SK cells (Primary recipients, week 8<sup>th</sup> post-transplantation) were  
250 generated and amplified using Discover-sc WTA Kit V2 (Vazyme). B2m and Gapdh were used  
251 to assess the quality of the amplified cDNA by qPCR analysis. The qualified samples were  
252 used to prepare the sequencing library by the TruePrep DNA Library Prep Kit V2 (Vazyme),  
253 and the qualified libraries were sequenced by illumina sequencer NextSeq 500. Raw data (fastq  
254 files) were generated using bcl2fastq software (version 2.16.0.10) and were uploaded to the  
255 Gene Expression Omnibus public database (GSE NO.183800). HISAT2 (version 2.1.0) were  
256 used to align the raw data, and the StringTie (version 1.3.4) were used to estimate the  
257 expression level in the transcripts per million (TPM) as previously reported(Pertea et al., 2016;  
258 Pertea et al., 2015). The DESeq2 was used for differential expression analysis, and the related  
259 Heatmaps were potted using pheatmap (version 1.0.8). Principle Component Analysis (PCA)  
260 were used by prcomp function of stats (R package, version 3.4.4) and PCA plots and violin  
261 plots were plotted using ggplot2 (R package, version 2.2.1). Gene set-enrichment analysis  
262 (GSEA) and gene-ontology (GO)-enrichment analysis (clusterProfiler package) were  
263 performed as described(Subramanian et al., 2005; Yu et al., 2012).

#### 264 **Acknowledgments**

265 This work was supported by grants from the grants from the National Natural Science  
266 Foundation of China (Grant No. 82100127, 81925002, 31900816).

#### 267 **Author Contributions**



268 J.W., F.H., and Q.Z. designed the project. F.H., Q.Z. and D.H conducted all the experiments  
269 and data analysis. M.Z. performed the RNA-seq experiments, and Q.W. analyzed the RNA-  
270 seq data. Q. Z. performed part of the mouse genotype experiments. K.W., Q.W., and J.X.  
271 performed the irradiation experiments, L. L., C.X., and T.W. participated in the Human cord  
272 blood MPP experiments. X.L. and Y.G. setup the flow cytometry. Y.G. ordered the experiment  
273 reagents. H.C., F.D., F.H. and J.W discussed the data. F.H. and J.W. wrote the manuscript and  
274 approved it

## 275 **Conflict of Interest**

276 The authors declare there's no competing financial interests in relation to the work described

## 277 **References**

- 278 Abkowitz, J.L., Catlin, S.N., McCallie, M.T., and Gutterop, P. (2002). Evidence that the number  
279 of hematopoietic stem cells per animal is conserved in mammals. *Blood* *100*, 2665-2667.
- 280 Adolfsson, J., Borge, O.J., Bryder, D., Theilgaard-Monch, K., Astrand-Grundstrom, I.,  
281 Sitnicka, E., Sasaki, Y., and Jacobsen, S.E. (2001). Upregulation of Flt3 expression within the  
282 bone marrow Lin(-)Scal(+)c-kit(+) stem cell compartment is accompanied by loss of self-  
283 renewal capacity. *Immunity* *15*, 659-669.
- 284 Baker, S.J., Ma'ayan, A., Lieu, Y.K., John, P., Reddy, M.V., Chen, E.Y., Duan, Q., Snoeck,  
285 H.W., and Reddy, E.P. (2014). B-myb is an essential regulator of hematopoietic stem cell and  
286 myeloid progenitor cell development. *Proc Natl Acad Sci U S A* *111*, 3122-3127.
- 287 Bayley, R., Blakemore, D., Cancian, L., Dumon, S., Volpe, G., Ward, C., Almaghrabi, R.,  
288 Gujar, J., Reeve, N., Raghavan, M., *et al.* (2018). MYBL2 Supports DNA Double Strand Break  
289 Repair in Hematopoietic Stem Cells. *Cancer Res* *78*, 5767-5779.
- 290 Bernitz, J.M., Kim, H.S., MacArthur, B., Sieburg, H., and Moore, K. (2016). Hematopoietic  
291 Stem Cells Count and Remember Self-Renewal Divisions. *Cell* *167*, 1296-1309 e1210.
- 292 Chen, J.Y., Miyanishi, M., Wang, S.K., Yamazaki, S., Sinha, R., Kao, K.S., Seita, J., Sahoo,  
293 D., Nakauchi, H., and Weissman, I.L. (2016). Hoxb5 marks long-term haematopoietic stem  
294 cells and reveals a homogenous perivascular niche. *Nature* *530*, 223-227.
- 295 Chhabra, A., and Mikkola, H.K. (2011). Return to youth with Sox17. *Genes Dev* *25*, 1557-  
296 1562.
- 297 Dalton, S. (2015). Linking the Cell Cycle to Cell Fate Decisions. *Trends Cell Biol* *25*, 592-600.
- 298 de Bruijn, M., and Dzierzak, E. (2017). Runx transcription factors in the development and  
299 function of the definitive hematopoietic system. *Blood* *129*, 2061-2069.
- 300 Flach, J., Bakker, S.T., Mohrin, M., Conroy, P.C., Pietras, E.M., Reynaud, D., Alvarez, S.,  
301 Diolaiti, M.E., Ugarte, F., Forsberg, E.C., *et al.* (2014). Replication stress is a potent driver of  
302 functional decline in ageing haematopoietic stem cells. *Nature* *512*, 198-202.
- 303 Gao, S.W., and Liu, F. (2019). Novel insights into cell cycle regulation of cell fate  
304 determination. *J Zhejiang Univ Sci B* *20*, 467-475.

305 Gerrits, A., Walasek, M.A., Olthof, S., Weersing, E., Ritsema, M., Zwart, E., van Os, R.,  
306 Bystrykh, L.V., and de Haan, G. (2012). Genetic screen identifies microRNA cluster 99b/let-  
307 7e/125a as a regulator of primitive hematopoietic cells. *Blood* *119*, 377-387.

308 Gulati, G.S., Zukowska, M., Noh, J.J., Zhang, A., Wesche, D.J., Sinha, R., George, B.M.,  
309 Weissman, I.L., and Szade, K. (2019). Neogenin-1 distinguishes between myeloid-biased and  
310 balanced Hoxb5 (+) mouse long-term hematopoietic stem cells. *Proc Natl Acad Sci U S A* *116*,  
311 25115-25125.

312 Guo, S., Bai, H., Megyola, C.M., Halene, S., Krause, D.S., Scadden, D.T., and Lu, J. (2012).  
313 Complex oncogene dependence in microRNA-125a-induced myeloproliferative neoplasms.  
314 *Proc Natl Acad Sci U S A* *109*, 16636-16641.

315 Guo, S., Lu, J., Schlanger, R., Zhang, H., Wang, J.Y., Fox, M.C., Purton, L.E., Fleming, H.H.,  
316 Cobb, B., Merckenschlager, M., *et al.* (2010). MicroRNA miR-125a controls hematopoietic  
317 stem cell number. *Proc Natl Acad Sci U S A* *107*, 14229-14234.

318 Gurbuxani, S., Xu, Y., Keerthivasan, G., Wickrema, A., and Crispino, J.D. (2005). Differential  
319 requirements for survivin in hematopoietic cell development. *Proc Natl Acad Sci U S A* *102*,  
320 11480-11485.

321 He, S., Kim, I., Lim, M.S., and Morrison, S.J. (2011). Sox17 expression confers self-renewal  
322 potential and fetal stem cell characteristics upon adult hematopoietic progenitors. *Genes Dev*  
323 *25*, 1613-1627.

324 Hu, M., and Shivdasani, R.A. (2005). Overlapping gene expression in fetal mouse intestine  
325 development and human colorectal cancer. *Cancer Res* *65*, 8715-8722.

326 Kiel, M.J., Yilmaz, O.H., Iwashita, T., Yilmaz, O.H., Terhorst, C., and Morrison, S.J. (2005).  
327 SLAM family receptors distinguish hematopoietic stem and progenitor cells and reveal  
328 endothelial niches for stem cells. *Cell* *121*, 1109-1121.

329 Kim, I., He, S., Yilmaz, O.H., Kiel, M.J., and Morrison, S.J. (2006). Enhanced purification of  
330 fetal liver hematopoietic stem cells using SLAM family receptors. *Blood* *108*, 737-744.

331 Krivtsov, A.V., Twomey, D., Feng, Z., Stubbs, M.C., Wang, Y., Faber, J., Levine, J.E., Wang,  
332 J., Hahn, W.C., Gilliland, D.G., *et al.* (2006). Transformation from committed progenitor to  
333 leukaemia stem cell initiated by MLL-AF9. *Nature* *442*, 818-822.

334 Kumar, S., and Geiger, H. (2017). HSC Niche Biology and HSC Expansion Ex Vivo. *Trends*  
335 *Mol Med* *23*, 799-819.

336 Morrison, S.J., Hemmati, H.D., Wandycz, A.M., and Weissman, I.L. (1995). The purification  
337 and characterization of fetal liver hematopoietic stem cells. *Proc Natl Acad Sci U S A* *92*,  
338 10302-10306.

339 Morrison, S.J., and Weissman, I.L. (1994). The long-term repopulating subset of hematopoietic  
340 stem cells is deterministic and isolatable by phenotype. *Immunity* *1*, 661-673.

341 Pertea, M., Kim, D., Pertea, G.M., Leek, J.T., and Salzberg, S.L. (2016). Transcript-level  
342 expression analysis of RNA-seq experiments with HISAT, StringTie and Ballgown. *Nat Protoc*  
343 *11*, 1650-1667.

344 Pertea, M., Pertea, G.M., Antonescu, C.M., Chang, T.C., Mendell, J.T., and Salzberg, S.L.  
345 (2015). StringTie enables improved reconstruction of a transcriptome from RNA-seq reads.  
346 *Nat Biotechnol* *33*, 290-295.

347 Sakamaki, T., Kao, K.S., Nishi, K., Chen, J.Y., Sadaoka, K., Fujii, M., Takaori-Kondo, A.,  
348 Weissman, I.L., and Miyanishi, M. (2021). Hoxb5 defines the heterogeneity of self-renewal

349 capacity in the hematopoietic stem cell compartment. *Biochem Biophys Res Commun* 539, 34-  
350 41.

351 Scheicher, R., Hoelbl-Kovacic, A., Bellutti, F., Tigan, A.S., Prchal-Murphy, M., Heller, G.,  
352 Schneckleithner, C., Salazar-Roa, M., Zochbauer-Muller, S., Zuber, J., *et al.* (2015). CDK6  
353 as a key regulator of hematopoietic and leukemic stem cell activation. *Blood* 125, 90-101.

354 Seita, J., and Weissman, I.L. (2010). Hematopoietic stem cell: self-renewal versus  
355 differentiation. *Wiley Interdiscip Rev Syst Biol Med* 2, 640-653.

356 Subramanian, A., Tamayo, P., Mootha, V.K., Mukherjee, S., Ebert, B.L., Gillette, M.A.,  
357 Paulovich, A., Pomeroy, S.L., Golub, T.R., Lander, E.S., *et al.* (2005). Gene set enrichment  
358 analysis: a knowledge-based approach for interpreting genome-wide expression profiles. *Proc*  
359 *Natl Acad Sci U S A* 102, 15545-15550.

360 Tajer, P., Pike-Overzet, K., Arias, S., Havenga, M., and Staal, F.J.T. (2019). Ex Vivo  
361 Expansion of Hematopoietic Stem Cells for Therapeutic Purposes: Lessons from Development  
362 and the Niche. *Cells* 8.

363 Ueno, M., Itoh, M., Sugihara, K., Asano, M., and Takakura, N. (2009). Both alleles of PSF1  
364 are required for maintenance of pool size of immature hematopoietic cells and acute bone  
365 marrow regeneration. *Blood* 113, 555-562.

366 Will, B., Vogler, T.O., Bartholdy, B., Garrett-Bakelman, F., Mayer, J., Barreyro, L., Pandolfi,  
367 A., Todorova, T.I., Okoye-Okafor, U.C., Stanley, R.F., *et al.* (2013). Satb1 regulates the self-  
368 renewal of hematopoietic stem cells by promoting quiescence and repressing differentiation  
369 commitment. *Nat Immunol* 14, 437-445.

370 Wojtowicz, E.E., Lechman, E.R., Hermans, K.G., Schoof, E.M., Wienholds, E., Isserlin, R.,  
371 van Veelen, P.A., Broekhuis, M.J., Janssen, G.M., Trotman-Grant, A., *et al.* (2016). Ectopic  
372 miR-125a Expression Induces Long-Term Repopulating Stem Cell Capacity in Mouse and  
373 Human Hematopoietic Progenitors. *Cell Stem Cell* 19, 383-396.

374 Wojtowicz, E.E., Walasek, M.A., Broekhuis, M.J., Weersing, E., Ritsema, M., Ausema, A.,  
375 Bystrykh, L.V., and de Haan, G. (2014). MicroRNA-125 family members exert a similar role  
376 in the regulation of murine hematopoiesis. *Exp Hematol* 42, 909-918 e901.

377 Yasui, D., Miyano, M., Cai, S., Varga-Weisz, P., and Kohwi-Shigematsu, T. (2002). SATB1  
378 targets chromatin remodelling to regulate genes over long distances. *Nature* 419, 641-645.

379 Yasunaga, S., Ohno, Y., Shirasu, N., Zhang, B., Suzuki-Takedachi, K., Ohtsubo, M., and  
380 Takihara, Y. (2016). Role of Geminin in cell fate determination of hematopoietic stem cells  
381 (HSCs). *Int J Hematol* 104, 324-329.

382 Yu, G., Wang, L.G., Han, Y., and He, Q.Y. (2012). clusterProfiler: an R package for comparing  
383 biological themes among gene clusters. *OMICS* 16, 284-287.

384 Zhang, M., Dong, Y., Hu, F., Yang, D., Zhao, Q., Lv, C., Wang, Y., Xia, C., Weng, Q., Liu,  
385 X., *et al.* (2018). Transcription factor Hoxb5 reprograms B cells into functional T lymphocytes.  
386 *Nat Immunol* 19, 279-290.

387  
388  
389  
390  
391  
392

393 **Figure and figure legends**

394 **Figure 1**

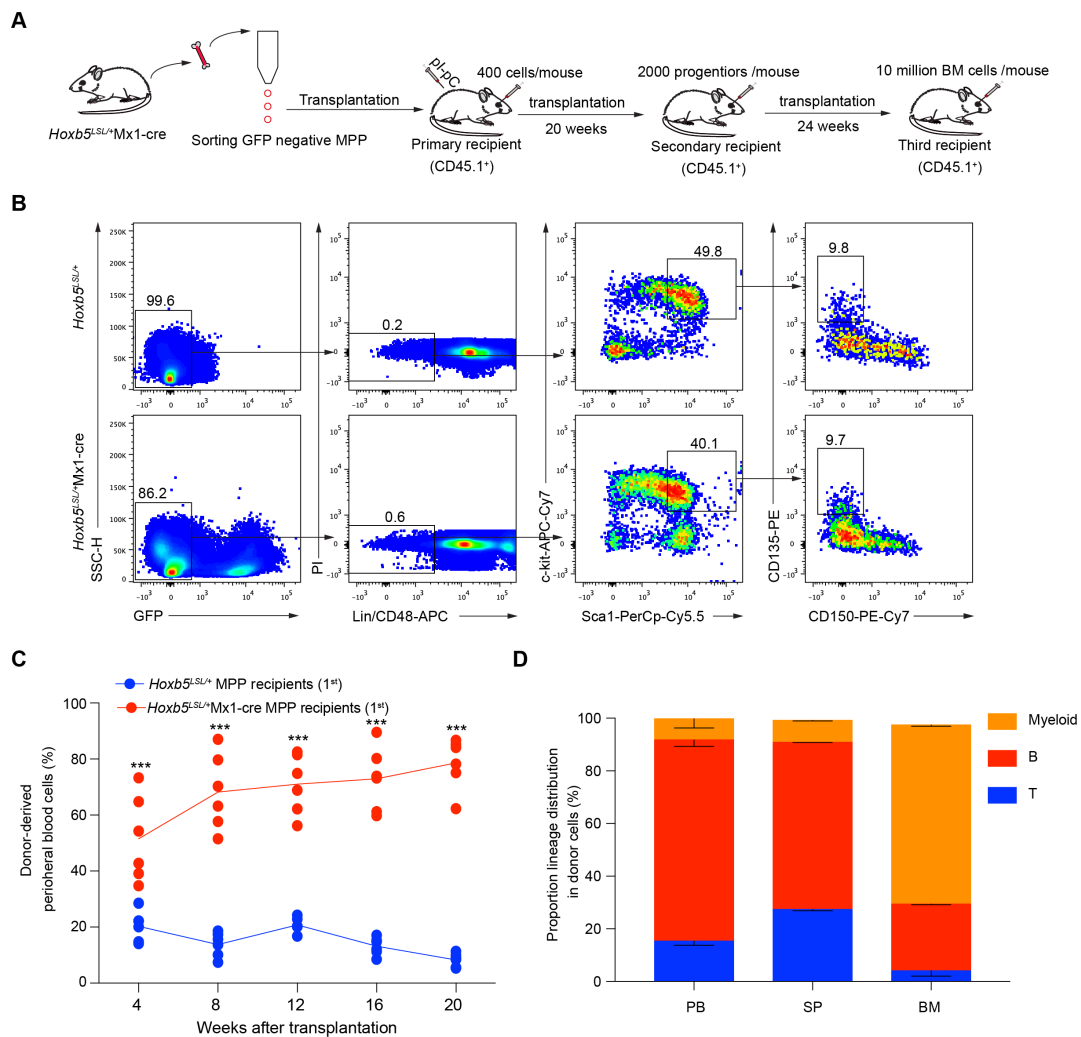

395

396 **Figure 1. Overexpression of Hoxb5 impowers long-term reconstitution capacity on MPP.**

397 **(A)** The scheme for MPP transplantation. **(B)** Gating strategy for sorting the MPP. MPP were  
 398 defined as CD45.2<sup>+</sup>GFP<sup>+</sup>Lin<sup>-</sup> (CD2<sup>-</sup>CD3<sup>-</sup>CD4<sup>-</sup>CD8<sup>-</sup>Mac-1<sup>-</sup>Gr1<sup>-</sup>B220<sup>-</sup>Ter119<sup>-</sup>) CD48<sup>+</sup>Sca1<sup>+</sup>c-  
 399 kit<sup>+</sup>CD150<sup>-</sup>CD135<sup>+</sup> from either the *Hoxb5<sup>LSL/+</sup>Mx1-cre* mice or *Hoxb5<sup>LSL/+</sup>* control mice (8  
 400 weeks old). The sorted MPP were transplanted into lethally irradiated (9.0 Gy) C57BL/6 mouse  
 401 (CD45.1<sup>+</sup>, 400 cells/mouse) with CD45.1<sup>+</sup>Sca1<sup>-</sup> helper cells (0.25million/mouse). Recipients  
 402 were injected with pIpC (ip, 250 ug/mouse) every other day for six times starting from day 5  
 403 before transplantation. **(C)** Contribution curves of the donor-derived cells in peripheral blood  
 404 cells (PB) of the primary recipients. The donor cells were defined as CD45.2<sup>+</sup>GFP<sup>+</sup>  
 405 (*Hoxb5<sup>LSL/+</sup>Mx1-cre* MPP recipients) or CD45.2<sup>+</sup> (*Hoxb5<sup>LSL/+</sup>* MPP recipients). The PB of the  
 406 recipients transplanted with *Hoxb5<sup>LSL/+</sup>Mx1-cre* MPP (n = 6, as indicated by the red dot) or  
 407 *Hoxb5<sup>LSL/+</sup>* MPP (n = 6, as indicated by the blue dot) were analyzed every four weeks until the  
 408 20<sup>th</sup> weeks after transplantation. mean ± SD, \*\*\*p < 0.001. Independent Samples *t* test.

409 (D) Lineages distribution of the recipients (n = 3) at 20<sup>th</sup> week after *Hoxb5*<sup>LSL/+</sup>Mx1-cre MPP  
 410 transplantation. Columns shown are percentages of donor-derived T cells (CD3<sup>+</sup>), B cells  
 411 (CD19<sup>+</sup>) and myeloid cells (Mac-1<sup>+</sup> or Gr1<sup>+</sup>) in PB, spleen (SP), and bone marrow (BM).

412

413 **Figure 2**

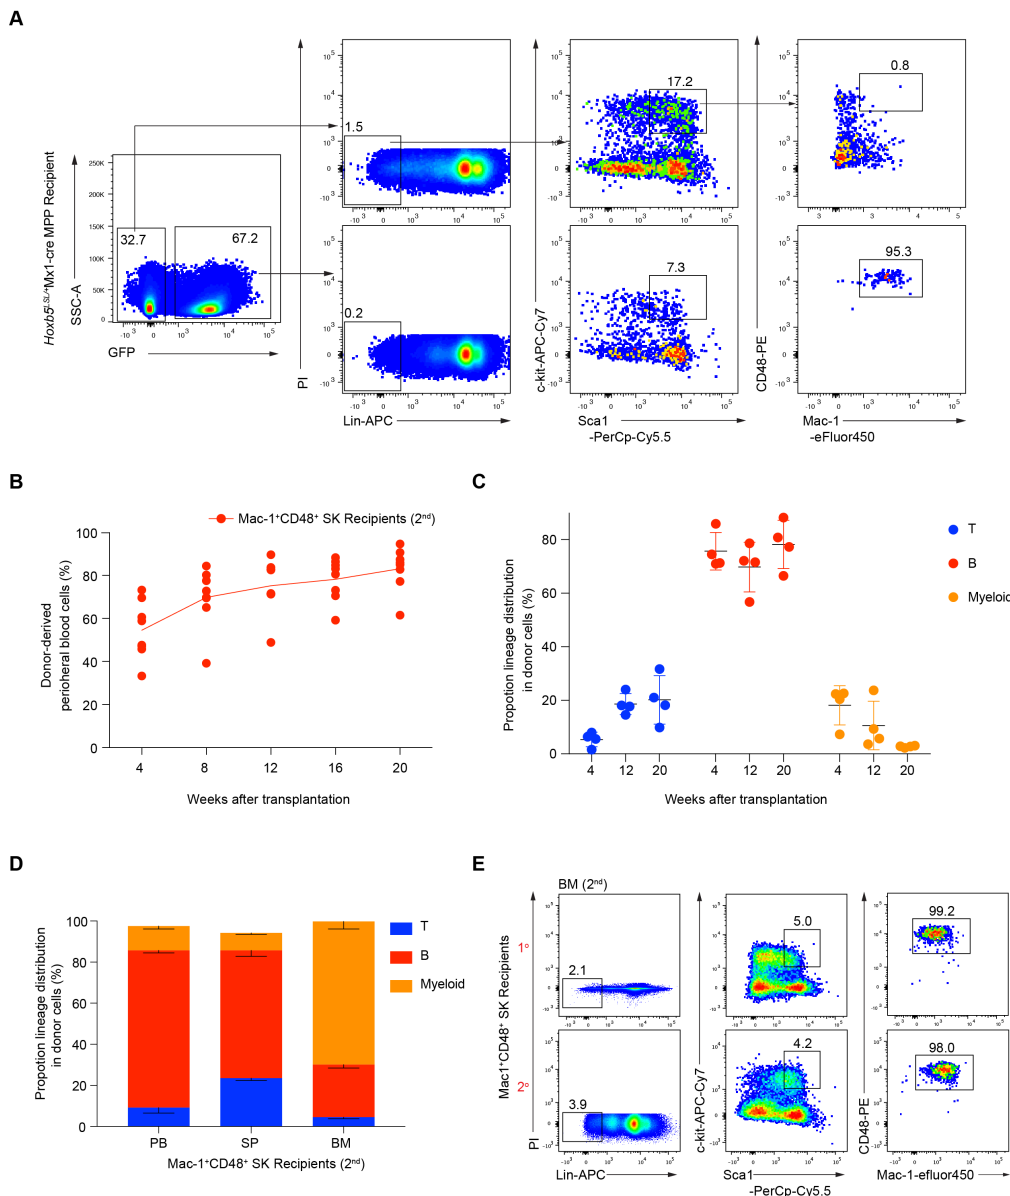

414

415 **Figure 2. A *de novo* Mac-1<sup>+</sup>CD48<sup>+</sup> SK cell population reconstitute hematopoiesis in**  
 416 **secondary recipients.**

417 (A) FACS analysis of the donor-derived BM progenitors in the primary recipients 20 weeks  
 418 post-transplantation. Antibodies of Lineages (CD2<sup>-</sup>CD3<sup>-</sup>CD4<sup>-</sup>CD8<sup>-</sup>Mac-1<sup>-</sup>Gr1<sup>-</sup>B220<sup>-</sup>Ter119<sup>-</sup>)  
 419 (Lin), Sca1, c-kit, Mac-1 and CD48 were stained the BM of *Hoxb5*<sup>LSL/+</sup>Mx1-cre MPP recipients.  
 420 Mac-1<sup>+</sup>CD48<sup>+</sup> SK were defined as CD45.2<sup>+</sup>GFP<sup>+</sup>Lin<sup>-</sup>Sca1<sup>+</sup>c-kit<sup>+</sup>CD48<sup>+</sup>Mac-1<sup>+</sup> were sorted  
 421 from the primary recipients 20 weeks post-transplantation, and retro-orbitally transplanted into

422 secondary recipients (9.0 Gy, 2000 cells/mouse). **(B)** Chimeras curves of the donor cells to the  
 423 peripheral blood (PB) cells of the secondary recipients (n = 7). For the secondary  
 424 transplantation, Mac-1<sup>+</sup>CD48<sup>+</sup> SK cells were retro-orbitally injected into the lethally irradiated  
 425 recipients (9.0 Gy, 2000 cells/mouse). The donor-derived cells (CD45.2<sup>+</sup>GFP<sup>+</sup>) in the PB were  
 426 analyzed every four weeks post-transplantation. **(C)** Lineages distribution in PB of the  
 427 secondary recipients (n = 4) at the week- 4<sup>th</sup>, 12<sup>th</sup> and 20<sup>th</sup> post-transplantation. Proportions of  
 428 the CD3<sup>+</sup> (T), CD19<sup>+</sup> (B), Mac1<sup>+</sup> (Myeloid) in donor-derived cells were analyzed. **(D)** Lineages  
 429 distribution of the recipients (n = 3) at 24<sup>th</sup> week after Mac-1<sup>+</sup>CD48<sup>+</sup> SK transplantation.  
 430 Columns shown are percentages of donor-derived T cells (CD3<sup>+</sup>), B cells (CD19<sup>+</sup>) and myeloid  
 431 cells (Mac-1<sup>+</sup> or Gr1<sup>+</sup>) in PB, spleen (SP), and bone marrow (BM). **(E)** Immuno-phenotypes  
 432 of the donor-derived Mac-1<sup>+</sup>CD48<sup>+</sup> SK in the bone marrow (BM) of the secondary recipients.  
 433 Two representative mice were shown.

434

435 **Figure 3**

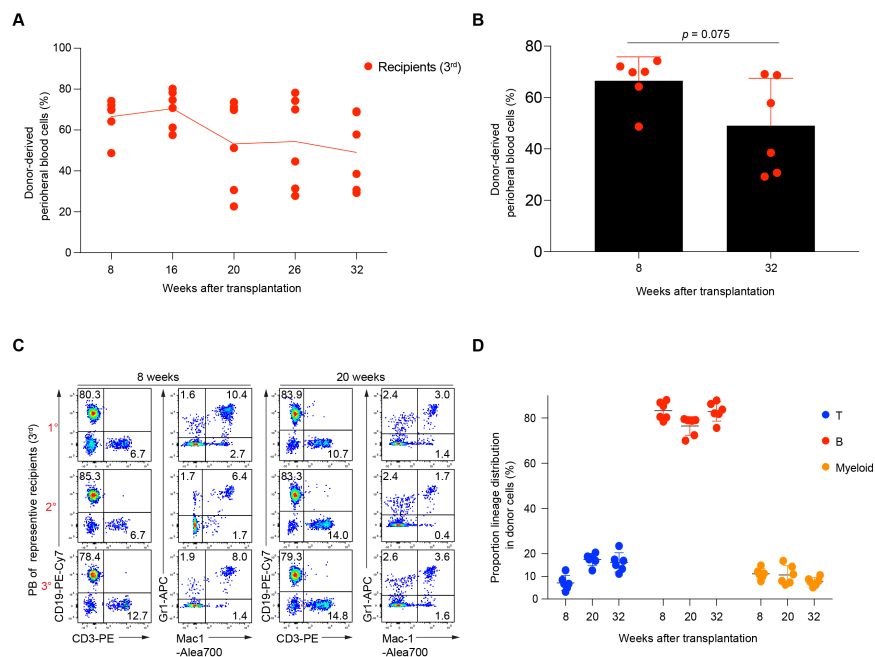

436

437 **Figure 3. Mac-1<sup>+</sup>CD48<sup>+</sup> SK cells still maintained the repopulation capacity in the third**  
 438 **transplantation recipients.**

439 **(A)** Chimeras curves of the donor cells to the PB of the secondary recipients (n = 6). Donor-  
 440 derived cells (CD45.2<sup>+</sup>GFP<sup>+</sup>) in the PB were analyzed at 8<sup>th</sup>, 16<sup>th</sup>, 20<sup>th</sup>, 26<sup>th</sup> and 32<sup>th</sup> week post-  
 441 transplantation. For the third transplantation, recipients (CD45.1<sup>+</sup> C57BL/6) were lethally  
 442 irradiated (9 Gy) and then were retro-orbitally injected with the nucleated BM cells (10  
 443 million/mouse) isolated from the secondary recipients. **(B)** Comparison of the donor derived  
 444 cells (CD45.2<sup>+</sup>GFP<sup>+</sup>) ratio at 8 weeks and 32 weeks post-transplantation. Independent Samples

445 *t* test. **(C)** Representative FACS analysis ( $n = 3$ ) of the PB from the third transplantation  
 446 recipients (3<sup>rd</sup>) after transplanting with the total BM cells of the secondary recipients 8 weeks  
 447 and 20 weeks later. **(D)** Lineages distribution in PB of the third recipients ( $n = 6$ ) at the week-  
 448 8<sup>th</sup>, 20<sup>th</sup> and 32<sup>th</sup> post-transplantation. Proportions of the CD3<sup>+</sup> (T), CD19<sup>+</sup> (B), Mac1<sup>+</sup> or Gr1<sup>+</sup>  
 449 (Myeloid) in donor-derived cells were analyzed.

450

451 **Figure 4**

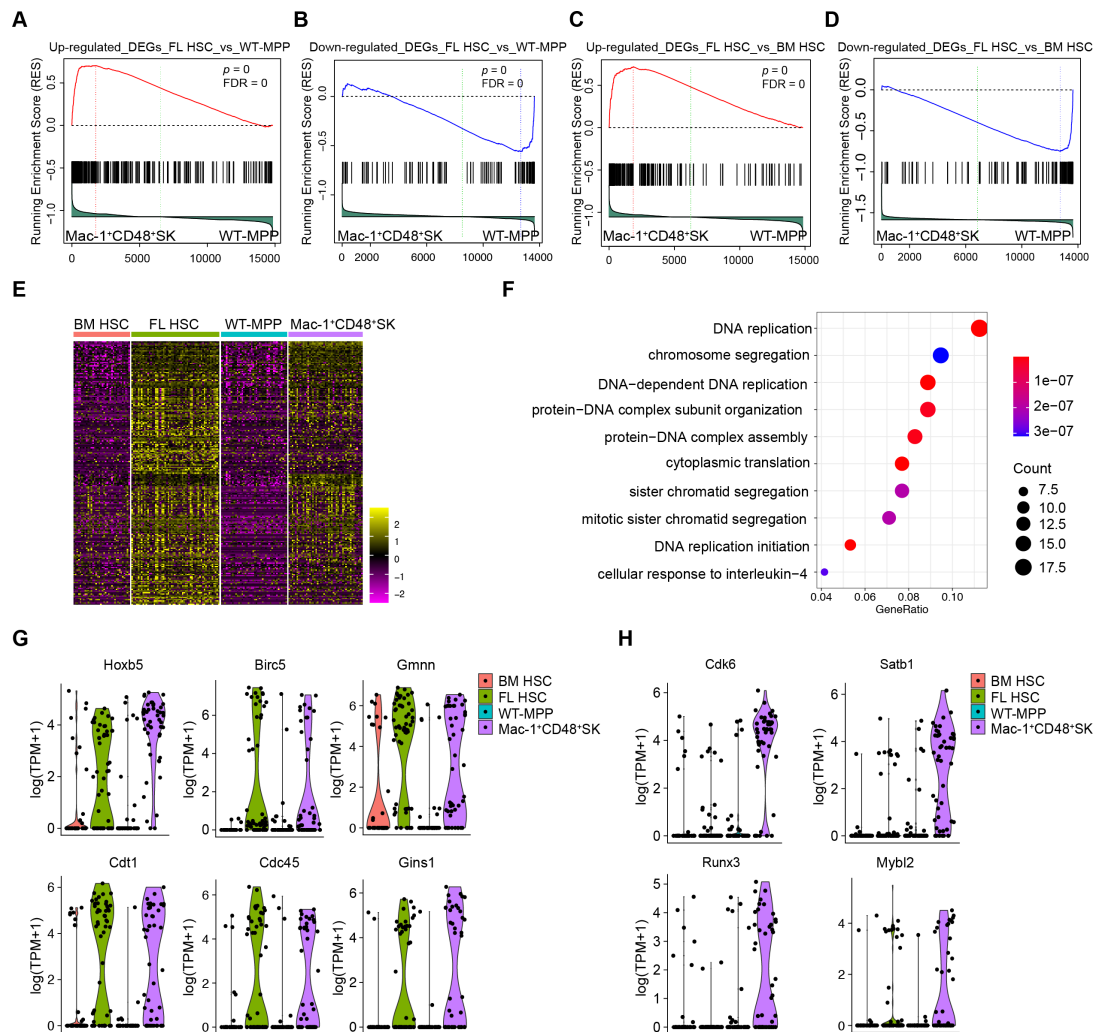

452

453 **Figure 4. Rapid proliferation features of Mac-1<sup>+</sup>CD48<sup>+</sup> SK cells at single cell resolution.**

454 **(A)** Gene set–enrichment analysis of WT-MPP ( $n = 42$ ) and Mac-1<sup>+</sup>CD48<sup>+</sup> SK ( $n = 47$ ). The  
 455 gene set used to analysis were from the up-regulated genes in FL HSC ( $n = 56$ ) versus WT-  
 456 MPP ( $n = 42$ ) (adjusted P value <0.05). **(B)** Gene set–enrichment analysis of WT-MPP ( $n = 42$ )  
 457 and Mac-1<sup>+</sup>CD48<sup>+</sup> SK ( $n = 47$ ). The gene set used to analysis were from the down-regulated  
 458 genes in FL HSC ( $n = 56$ ) versus WT-MPP ( $n = 42$ ) (adjusted P value <0.05). **(C)** Gene set–  
 459 enrichment analysis of WT-MPP ( $n = 42$ ) and Mac-1<sup>+</sup>CD48<sup>+</sup> SK ( $n = 47$ ). The gene set used  
 460 to analysis were from the up-regulated genes in FL HSC ( $n = 56$ ) versus BM HSC( $n = 36$ )

461 (adjusted P value <0.05). **(D)** Gene set–enrichment analysis of WT-MPP (n = 42) and Mac-  
462 1<sup>+</sup>CD48<sup>+</sup> SK (n = 47). The gene set used to analysis were from the down-regulated genes in  
463 FL HSC (n = 56) versus BM HSC(n = 36) (adjusted P value <0.05). **(E)** Heatmap analysis of  
464 the BM HSC, FL HSC, WT-MPP and Mac-1<sup>+</sup>CD48<sup>+</sup> SK. Genes used to analysis were from  
465 the leading edge genes in **(A)** and **(C)**. **(F)** Gene ontology (GO) enrichment analysis of genes  
466 from the leading edge genes in **(A)** and **(C)**. Each symbol represents a GO term (noted in plot);  
467 color indicates adjusted P value (P<sub>adj</sub> (significance of the GO term)), and symbol size is  
468 proportional to the number of genes. **(G)** Violin plots show the expression profile of selected  
469 factors (Hoxb5, Birc5, Gmn, Cdt1, Cdc48 and Gins1) both in Mac-1<sup>+</sup>CD48<sup>+</sup> SK and FL HSC  
470 related to DNA replication, cell division and hematopoiesis at single cell resolution. **(H)** Violin  
471 plots show the expression profile of selected factors (Cdk6, Satb1, Runx3 and Mybl2)  
472 preferentially expressed in Mac-1<sup>+</sup>CD48<sup>+</sup> SK related to hematopoiesis at single cell resolution.

473

474 **Figure supplement 1**



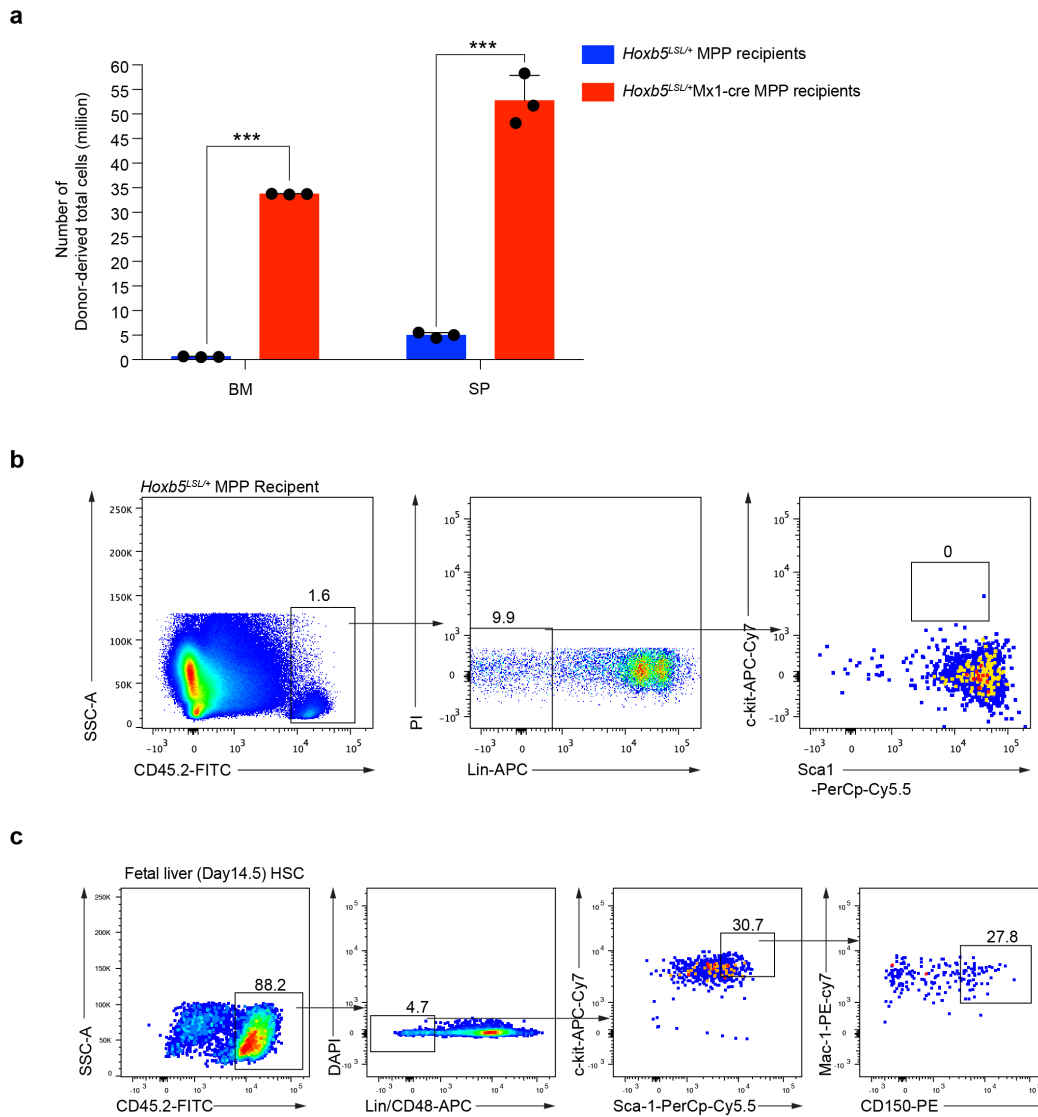

475

476 **Figure supplement 1. (A)** Statistic analysis of the absolute cell counts in the bone marrow

477 (BM) and spleens (SP) of the donor-derived cells from the *Hoxb5<sup>LSL/+</sup>* MPP recipients or

478 *Hoxb5<sup>LSL/+</sup>*Mx1-cre MPP recipients. mean  $\pm$  SD, \*\*\* $p$ <0.001. Independent Samples *t* test.

479 **(B)** FACS analysis of the donor-derived LSK cells from *Hoxb5<sup>LSL/+</sup>* MPP recipients 20 weeks

480 post-transplantation. Antibodies of Lineages (CD2<sup>-</sup>CD3<sup>-</sup>CD4<sup>-</sup>CD8<sup>-</sup>Mac-1<sup>-</sup>Gr1<sup>-</sup>B220<sup>-</sup>Ter119<sup>-</sup>)

481 (Lin), Sca1, c-kit, Mac-1 and CD48 were stained the BM of the recipients. **(C)** Sorting

482 strategy of the FL HSC. The fetal livers were dissected from embryos (day14.5), and the

483 antibody cocktail stained nucleated cells were used to sorting FL HSC (DAPI<sup>-</sup>

484 CD45.2<sup>+</sup>Lin(CD2<sup>-</sup>CD3<sup>-</sup>CD4<sup>-</sup>CD8<sup>-</sup>Gr1<sup>-</sup>Ter119<sup>-</sup>B220<sup>-</sup>IgM<sup>-</sup>CD48<sup>-</sup>)Sca-1<sup>+</sup>ckit<sup>+</sup>Mac1<sup>+</sup>CD150<sup>+</sup>).
